# Supplementary material for: A general neural network model co-driven by mechanism and data for the reliable design of gas–liquid T-junction microdevices
Source: Royal Society of Chemistry journal article supplement (doi:10.1039/d3lc00355h), 2023-01-01
Supplement: d3lc00355h2.pdf [file d3lc00355h2.pdf]

## Supplemental material

### 1. Normalization approach

The parameters with superscripts are the normalized input values

$$We_g' = (\ln We_g + 18) / 18$$

$$We_l' = (\ln We_l + 8) / 10$$

$$Ca' = (\ln Ca + 8) / 8$$

$$(Q_g / Q_l)' = (Q_g / Q_l) / 4$$

$$d_g' = d_g (\mu m) / 1000$$

$$d_l' = d_l (\mu m) / 1000$$

$$d_m' = d_m (\mu m) / 1000$$

$$\alpha_{gm}' = \cos \alpha_{gm}$$

$$\alpha_{lm}' = \cos \alpha_{lm}$$

### 2. Trained neural networks

The file with the name “square.pkl” is a neural network reflecting the bubble generation in the square gas inlet for T-junction microdevices while the file with the name “circle.pkl” reflecting the circle gas inlet.
